# Supplementary material for: Identification of LACTB2, a metallo-β-lactamase protein, as a human mitochondrial endoribonuclease
Source: PubMed Central journal article supplement (PMC4770246; doi:10.1093/nar/gkw050), 2016-01-29
Supplement: supp_gkw050_nar-01957-z-2015-File003.pdf [file supp_gkw050_nar-01957-z-2015-File003.pdf]

## Supplementary Information

### Identification of LACTB2, a metallo- $\beta$ -lactamase protein, as a human mitochondrial endoribonuclease

Shiri Levy<sup>1</sup>, Charles K. Allerston<sup>2,3</sup>, Varda Liveanu<sup>1</sup>, Mouna H. Rohana<sup>1</sup>, Opher Gileadi<sup>2,\*</sup> and Gadi Schuster<sup>1,\*</sup>

<sup>1</sup>Faculty of Biology, Technion- Israel Institute of Technology, Haifa 32000, Israel

<sup>2</sup>Structural Genomics Consortium, University of Oxford, Oxford OX3 7DQ, United Kingdom

<sup>3</sup>Current address: [Charles.allerston@gmail.com](mailto:Charles.allerston@gmail.com)

\*To whom correspondence should be addressed. Tel: +972-4-8293171; Email: [gadis@tx.technion.ac.il](mailto:gadis@tx.technion.ac.il)  
Correspondence may also be addressed to O.G., Tel. +44-1865-617572; Email: [opher.gileadi@sgc.ox.ac.uk](mailto:opher.gileadi@sgc.ox.ac.uk)

#### Supplemented Figures

##### Figure S1. LACTB2 active site exhibits high similarity to MBL ribonucleases RNase J1 and tRNase Z

**A.** The structure of the human LACTB2 active site (displayed in beige) is similar to that of the endo/exo ribonuclease RNase J1 (displayed in turquoise). Human LACTB2 (PDB 4AD9) and *T. thermophilus* RNase J (PDB:3BK2) were compared to draw structural similarity using the UCSF Chimera tool. The numbers of the homologous residues from LACTB2 (shown in the figure) and RNase J1 are, respectively, Motif II: His 77/75, His 79/77, Asp 81/79, and His 82/80. Motif III: His 145/150. Motif IV: Asp 164/172, and motif C/V: His 199/398. The two zinc ions are presented as purple spheres and hydrogen bonds are depicted as purple dashed lines. The single red bead represents a water or hydroxide oxygen.

**B.** The structure of the human LACTB2 (beige) active site is similar to that of the endoribonuclease tRNase Z (turquoise). Human LACTB2 (PDB:4AD9) and human nuclear tRNase Z (ELAC1; PDB:3ZWF) were compared to draw structural similarity using the UCSF Chimera tool. Residue numbers of LACTB2 (shown in the figure) and tRNase Z are, respectively, Motif II: His 77/62, His 79/64, Asp 81/66, and His 82/67. Motif III: His 145/182. Motif IV: Asp 164/253, and motif C/V: His 199/313.

**C.** The active site interface of human LACTB2 (4AD9) has a shallow catalytic cleft compared to a deeper pocket found in human CPSF73 (2I7T) and bacterial RNase J1 (3T3O). Ribbons represent the backbone of the proteins and the two light blue spheres represent the zinc ions. The structure of RNase J1 also includes a bound oligonucleotide, shown in a stick model.

**Figure S2: LACTB2 cleaves (AC)<sub>12</sub> RNA substrate following C.**

A 24 nt RNA oligo ribonucleotide with the sequence (AC)<sub>12</sub>, radioactively labeled at the 5' end, was incubated with the enzymes indicated. Incubation with LACTB2 was carried out for 15, 30 and 60 min at 37°C in buffer containing 12.5 mM Tris-HCl pH=7.4, 125 mM NaCl, 2.5 % glycerol and 0.25 mM DTT, as described in the materials and methods section. Incubation with RNase A (50 ng/ml) was performed on ice in the same buffer for 1, 2.5 and 5 min with the addition of 0.5 mg/ml yeast tRNA. Incubation with RNase P1 (0.01 u/ml) was performed as described for RNase A but in a buffer containing 20 mM Sodium acetate (pH=5.0), 0.5 mM Zinc acetate and 12% glycerol (1) . A 10 nt ladder is shown in the first lane to the left and an alkaline hydrolysis ladder of the (AC)<sub>12</sub> RNA is shown in the lane marked OH<sup>-</sup>. NP: incubation of the RNA with no protein. Note that the (AC)<sub>12</sub> RNA is sensitive to hydrolysis when placed in a solution even for a short time and during the elution of the full length RNA from the gel (Lane labeled NP and data not shown). No difference in the migration of the cleavage products that have OH or phosphate group at the 3' end is observed in this gel system. The only observed differences were in the migration of the cleavage products of RNase P1 that are shorter than 5 nt and slightly between the OH- and the other lanes. These differences could be attributed to the different salt concentrations. Indeed, no differences in the migration pattern were observed when the RNA were EtOH precipitated before loading on the gel (not shown).

**Figure S3: The ribonucleolytic activity of LACTB2 is inhibited by EDTA and o-phenanthroline.**

LACTB2 (7.5 pmol) was pre-incubated for 20 min with imidazole (50 mM), EDTA (50 mM) or o-phenanthroline (20 mM) and then a Cy3 5' labeled 37 nt RNA substrate (10 pmol) was added and the incubation continued for 30 and 60 min, when RNA was purified and analyzed by PAGE. (-): RNA was incubated for 60 min with no addition of protein.

**Figure S4. Mutated LACTB2 proteins display different RNA binding affinities.**

**A.** The non-mutated (WT) and mutated versions of LACTB2 were incubated with [<sup>32</sup>P]UTP-labeled RNA, followed by UV crosslinking, RNase A digestion, SDS-PAGE fractionation and autoradiography. NP- a control sample, in which no protein was added to the reaction mixture. A silver stained gel showing equal loading of the proteins is shown below the autoradiogram. In the lane labeled Δmotif II+WT, equal amounts of the two proteins were added to the reaction. Attempts to analyze the binding properties using a mobility shift assay without crosslinking were unsuccessful.

**B.** Electrostatic surface structure of LACTB2 (left), with a cartoon representation shown at the same orientation (right). Red and blue indicate negative and positive potentials (-/+ 5kT/e), respectively. The dotted black line indicates a putative trajectory of the RNA substrate. The sites of mutations tested in this study are shown on the cartoon model; mutations of R220, H216 and R217, which are distant from the catalytic site (motif II), severely reduce nuclease activity.

**Figure S5. Effects of down-regulation of LACTB2 on cell morphology.**

Image of HEK293 cells displaying morphological changes following 48h of LACTB2 down-regulation, as detected using a phase contrast cell observer microscope, with 60-fold magnification.

**Figure S6. Effects of overexpression of human LACTB2 on mitochondrial transcript levels and on cell morphology.**

Overexpression of LACTB2 causes a moderate decrease in the concentration of mitochondrial transcripts. A LACTB2 overexpression plasmid (pink bars) or an empty vector (brown bars) were transfected into HeLa cells. Cells were collected and analyzed 48h post-transfection by qRT-PCR. The GAPDH transcript was used as the reference gene for normalized expression calculations. The error bars show the standard error of the mean. **B.** Image of HeLa cells following 48h of LACTB2 overexpression, as detected under a phase contrast cell observer microscope, with 60-fold magnification.

**REFERENCES CITED**

1. Sollner-Webb, B., Cruz-Reyes, J. and Rusche, L.N. (2001) Direct sizing of RNA fragments using RNase-generated standards. *Methods Enzymol*, **342**, 378-383.

Figure S1.

**A** LACTB2: RNase J1

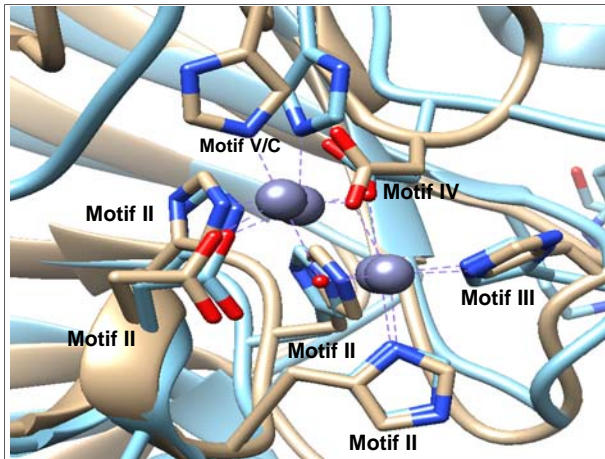

**B** LACTB2 : tRNase Z (ELAC1)

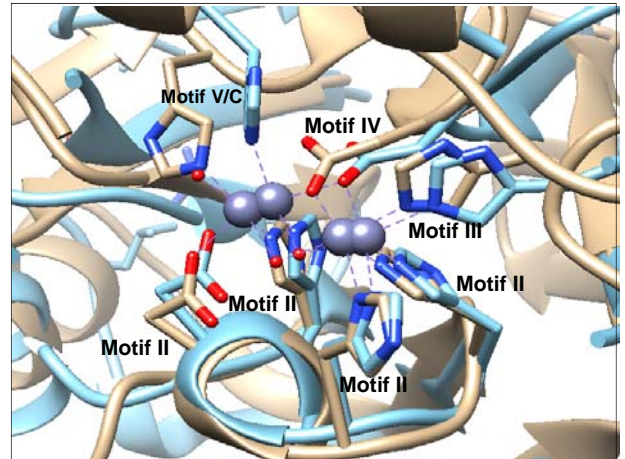

**C**

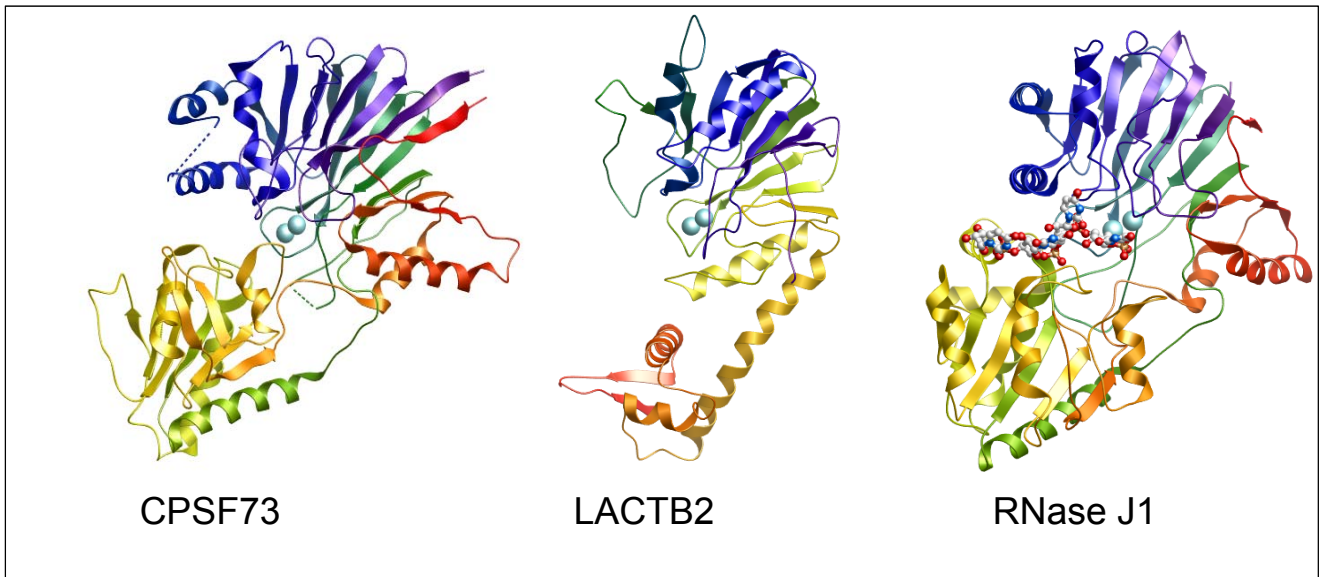

Figure S2

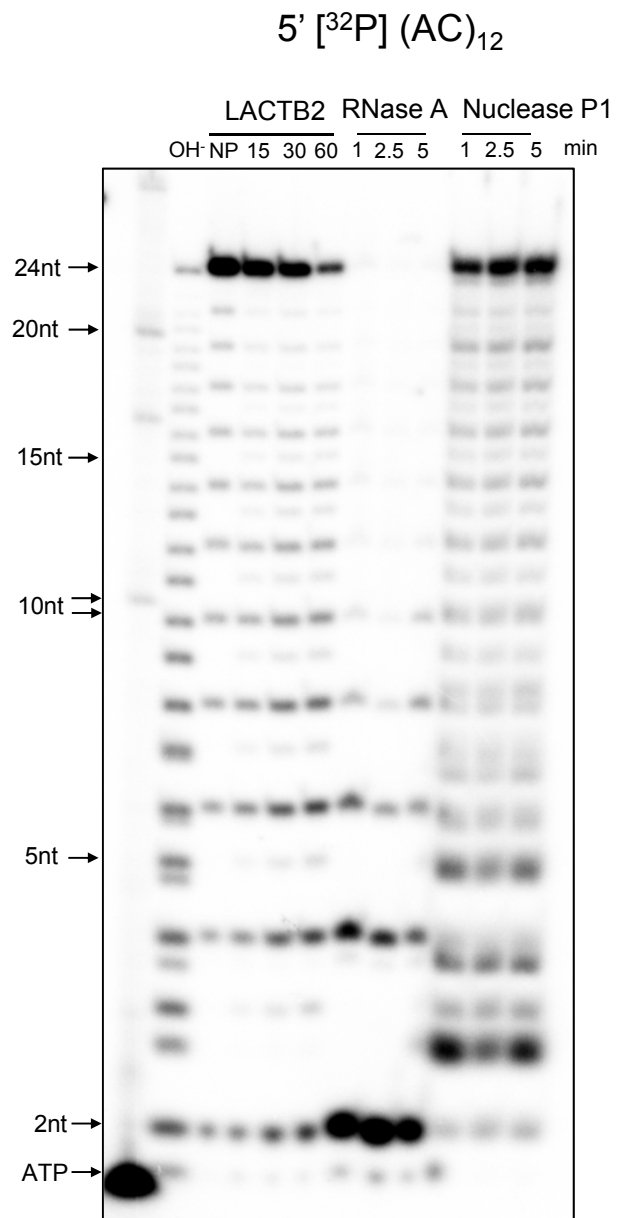

Figure S3.

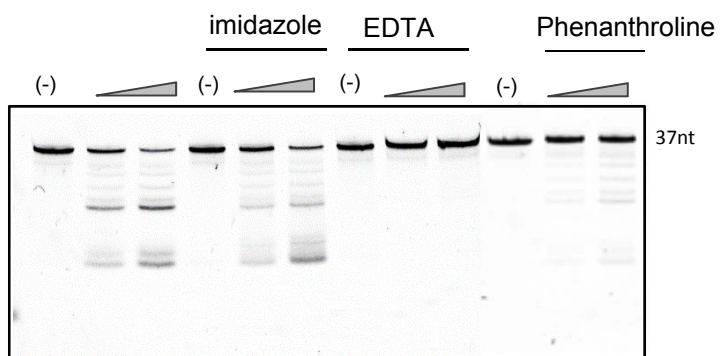

Figure S4.

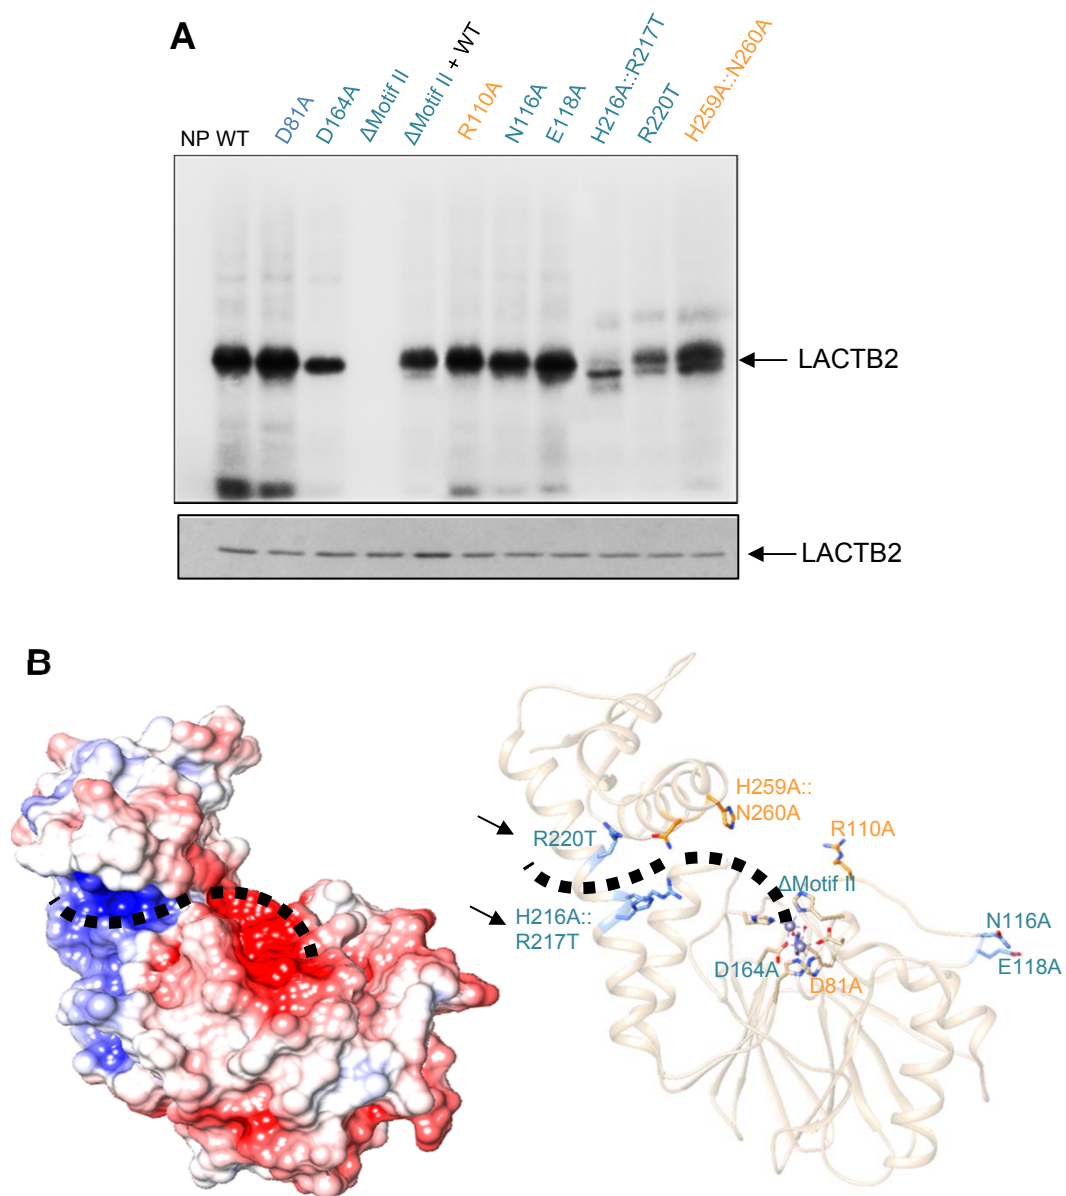

Figure S5.

Control

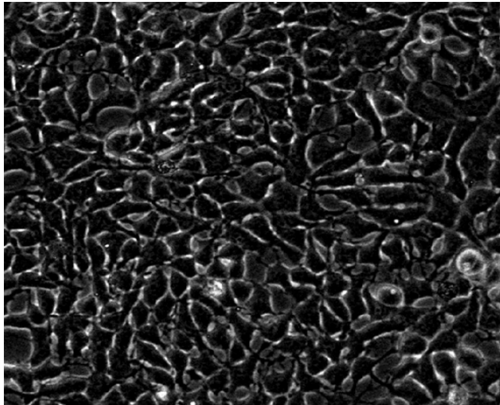

RNAi

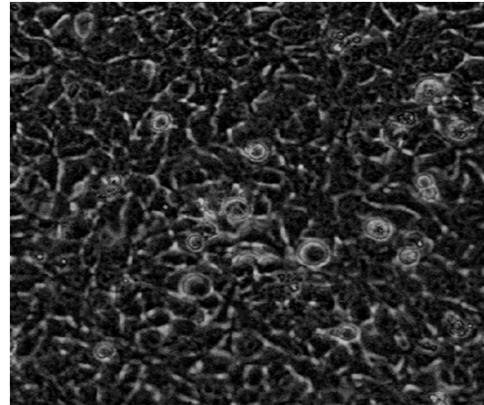



Figure S6.

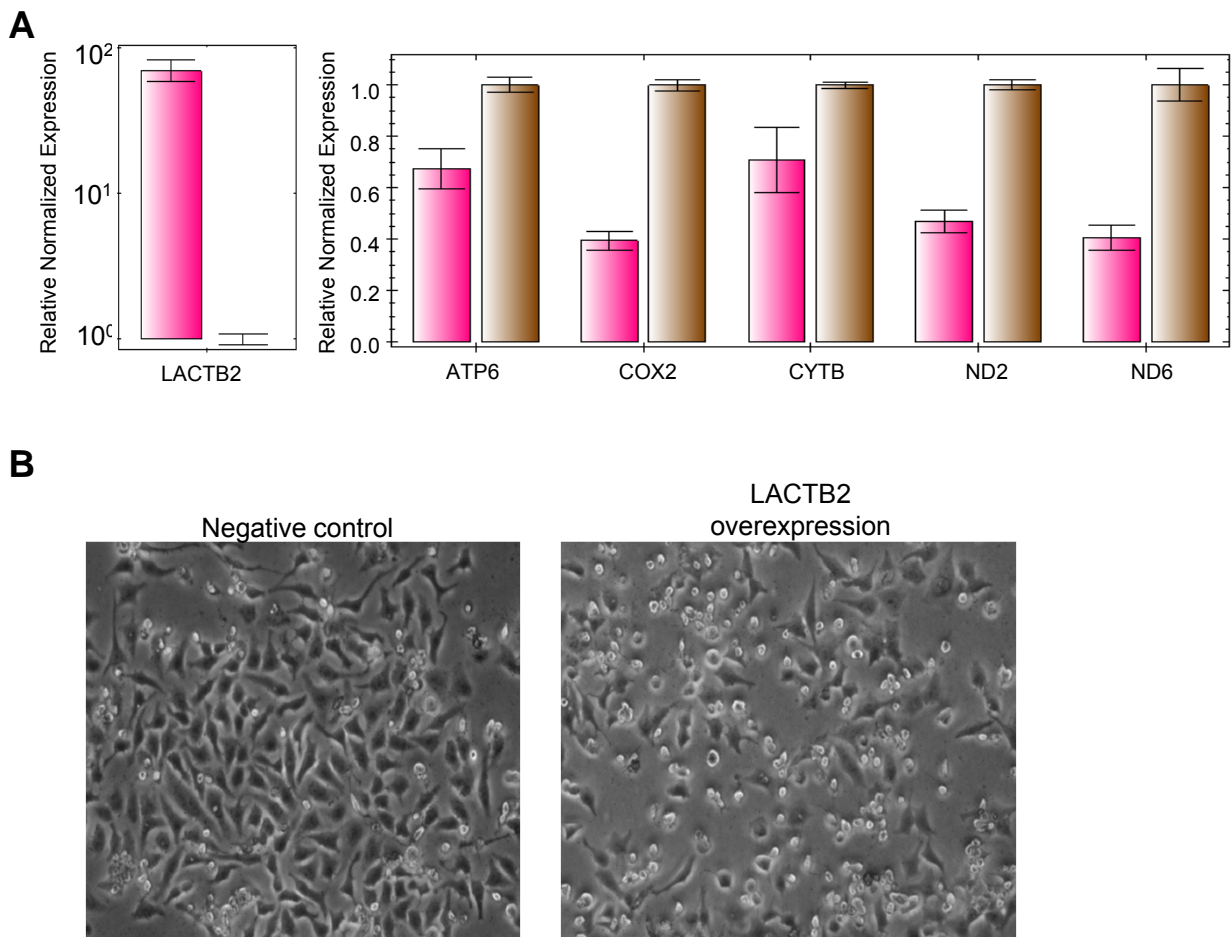

## Supplemented Tables

**Table S1: Oligonucleotide primers used for cloning and site directed mutagenesis**

| Primer name    | Sequence 5'-3'                                                              |
|----------------|-----------------------------------------------------------------------------|
| LACTB2_F       | TACTTCCAATCCATGGCTGCTGTACTGCAGCG                                            |
| LACTB2_R       | TATCCACCTTTACTGTCAAAGATGAGCTTCCATTTCTTGTC                                   |
| Δ motif II_F   | CCAGGAAATTGTAGTGACTTCTGGAGGCATAGGAGATATTTGTA                                |
| Δ motif II_R   | TACAAATATCTCCTATGCCTCCAGAAGTCACTACAATTTCTGG                                 |
| D81A_F         | CTCACTGGCACCGAGCTCATTCTGGAGGCAT                                             |
| D81A_R         | ATGCCTCCAGAATGAGCTCGGTGCCAGTGAG                                             |
| D164A_F        | TGCTATCTTTTCTGGAGCTTGCATCCTAGGGGAAG                                         |
| D164A_R        | CTTCCCCTAGGATGCAAGCTCCAGAAAAGATAGCA                                         |
| R110A_F        | AACTCCCACGGAATCCTCAGGCAGAAGAAATTATAGGAAATGG                                 |
| R110A_R        | CCATTTCTATAATTTCTTCTGCCTGAGGATTCCGTGGGAGTT                                  |
| N116A_F        | CGGAATCCTCAGAGAGAAGAAATTATAGGAGCTGGAGAGCAACAATAT                            |
| N116A_R        | ATATTGTTGCTCTCCAGCTCCTATAATTTCTTCTCTCTGAGGATTCCG                            |
| E118A_F        | GAGAAGAAATTATAGGAAATGGAGCGCAACAATATGTTTATCTGAAAGA                           |
| E118A_R        | TCTTTCAGATAAACATATTGTTGCGCTCCATTTCTATAATTTCTTCTC                            |
| H216A::R217T_F | ATGCTGAAGCTAAAATTCAACAATACATTTCTGCCACGAATATTCGAGAGCAGCAAATT<br>CTTAC        |
| H216A::R217T_R | GTAAGAATTTGCTGCTCTCGAATATTCGTGGCAGAAATGTATTGTTGAATTTTAGCTTCA<br>GCAT        |
| R220T_F        | GAAGCTAAAATTCAACAATACATTTCTCACAGAAATATTACGGAGCAGCAAATTCTTACA<br>TTATTTCTG   |
| R220T_R        | CGAAATAATGTAAGAATTTGCTGCTCCGTAATATTTCTGTGAGAAATGTATTGTTGAATT<br>TTAGCTTC    |
| H259::N260A_F  | ACAAGAATACTCCTGAGAATTTACATGAAATGGCTAAAGCTGCTCTTACTTCATTTGA<br>AAAAACTAG     |
| H259::N260A_R  | CTAGTTTTTTCAAATGAAGTAAGAGAGCAGCTTTAGCCATTTTCATGTAAATTTCTCAGGAG<br>TATTCTTGT |



|         |                                                    |
|---------|----------------------------------------------------|
| NB 12S  | GTTTTAAGCTGTGGCTCGTAGTGTTCTGGCGAGCAGTTTTGTTGATTTAA |
| NB ND1  | TATAAGTAATGCTAGGGTGAGTGGTAGGAAGTTTTTTCATAGGAGGTGTA |
| NB ND3  | GTGGCAGGTTAGTTGTTTGTAGGGCTCATGGTAGGGGTAAAAGGAGGGCA |
| NB ND4  | TGAGAATGACTGCGCCGGTGAAGCTTCAGGGGGTTTGGATGAGAATGGCT |
| NB ND4L | ACAATATTGGCTAAGAGGGAGTGGGTGTTGAGGGTTATGAGAGTAGCTAT |
| NB COX3 | TGCGAGTAATACGGATGTGTTTAGGAGTGGGACTTCTAGGGGATTTAGCG |
| NB CYTB | AGGAGAGAAGGAAGAGAAGTAAGCCGAGGGCGTCTTTGATTGTGTAGTAA |
| NB 16S  | TGAGGAGTAGGAGGTTGCCATGGGTATGTTGTTAAGAAGAGGAATTGAA  |

**Table S6: Oligonucleotide primers used for Real Time PCR analysis**

| Primer name | Sequence 5'-3'            |
|-------------|---------------------------|
| LACTB2_F    | CAAGGCACCAACACCTACCT      |
| LACTB2_R    | AGAATGATCTCGGTGCCAGT      |
| GAPDH_F     | ATCACCATCTTCCAGGAGCGA     |
| GAPDH_R     | TTCTCCATGGTGGTGAAGACG     |
| 12S_F       | GCAAGCATCCCCGTTCCAGTG     |
| 12S_R       | TTCCCGTGGGGGTGTGGCTA      |
| 16S_F       | AAAGCGTTCAAGCTCAACACC     |
| 16S_R       | TAATCTGACGCAGGCTTATGC     |
| ND1_F       | ACAACCCCTCGCTGACGCCAT     |
| ND1_R       | AGAGCTAAGGTCCGGGCGGT      |
| ND2_F       | TCCTCACGCAAGCAACCGCA      |
| ND2_R       | GCCGGATGTCAGAGGGGTGC      |
| ND3_F       | CCTATATCCCCCGCCCGCGT      |
| ND3_R       | GTTTGTAGGGCTCATGGTAGGGT   |
| ND4_F       | CCTCCGACCCCTAACAACCCCC    |
| ND4_R       | AGTGGCGTTGGCTTGCCATGA     |
| ND4L_F      | CGCTCACACCTCATATCCTCCCTAC |
| ND4L_R      | AAGAGGGAGTGGGTGTTGAGGGTT  |
| ND5_F       | ATCGGTTTCATCCTCGCCTTA     |
| ND5_R       | ACCTAATTGGGCTGATTTGCC     |
| ND6_F       | AACCCCTGACCCCATGCCTC      |
| ND6_R       | GCGGTGTGGTCCGGTGTGTTA     |
| COX1_F      | TCGGTGCCCCCGATATGGCGT     |
| COX1_R      | ACCTGTTCCCTGCTCCGGCCTCCA  |
| COX2_F      | ACAGATGCAATTCCCGGACGT     |

|            |                           |
|------------|---------------------------|
| COX2_R     | GGCATGAAACTGTGGTTTGCT     |
| COX3_F     | AGCCACAGGCTTCCACGGACT     |
| COX3_R     | CCAGTATCAGGCGGCGGCTTCG    |
| ATP6_F     | GGCACACCTACACCCCTTATCCCCA |
| ATP6_R     | AGCGGTTAGGCGTACGGCCAGG    |
| ATP8_F     | CCTACCTCCCTCACCAAAGCCCA   |
| ATP8_R     | TGTGGGGGCAATGAATGAAGCG    |
| Cyt B_F    | AGTCCCACCCTCACACGATTC     |
| Cyt B_R    | AGTAAGCCGAGGGCGTCTTTG     |
| tRNA Val_F | CAGAGTGTAGCTTAACACAAAG    |
| tRNA Val_R | TCAGAGCGGTCAAGTTAAGTT     |
| tRNA Glu_F | TGTAGTTGAAATACAACGATGGT   |
| tRNA Glu_F | TATTCTCGCACGGACTACAA      |
| tRNA Tyr_F | GGTAAAATGGCTGAGTGAAGCA    |
| tRNA Tyr_R | TGGTAAAAAGAGGCCTAACC      |
| tRNA Lys_F | CACTGTAAAGCTAACTTAGCATTAA |
| tRNA Lys_R | TCACTGTAAAGAGGTGTTGGTTCTC |
